# Supplementary material for: Abiotic Stresses Elicitation Potentiates the Productiveness of Cardoon Calli as Bio-Factories for Specialized Metabolites Production
Source: MDPI journal article supplement (doi:10.3390/antiox11061041), 2022-05-24
Supplement: s1 [file s1]

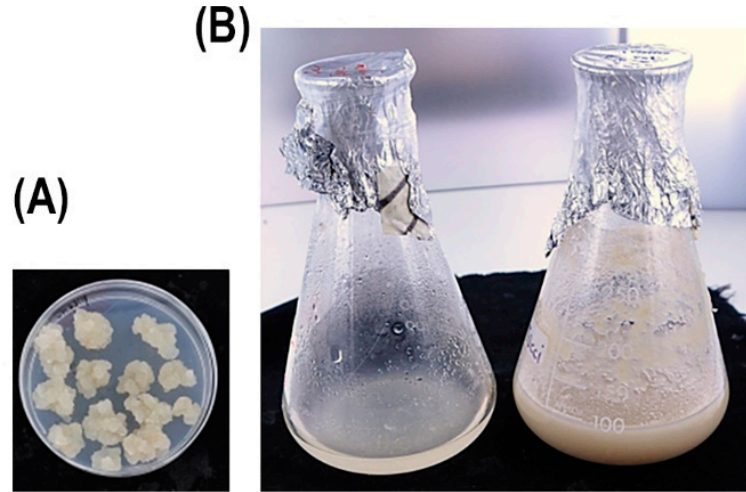

**Figure S1. A-B.** (A) Growth of cardoon calli upon 28 days subculturing on solid GB5 medium (B) Liquid growth of cardoon calli after subculturing in a fresh liquid medium (left side ) and upon 28 days of growth in liquid GB5 medium (right side).
